1     **Low frequency somatic copy number alterations in normal human**  
2             **lymphocytes revealed by large scale single-cell whole genome**  
3                     **profiling**  
4

5     Lu Liu<sup>1,#</sup>, He Chen<sup>1,#</sup>, Cheng Sun<sup>2,#</sup>, Jianyun Zhang<sup>3,#</sup>, Juncheng Wang<sup>2</sup>, Meijie Du<sup>4</sup>,  
6     Jie Li<sup>4</sup>, Lin Di<sup>1</sup>, Jie Shen<sup>5</sup>, Shuang Geng<sup>1</sup>, Yuhong Pang<sup>1</sup>, Yingying Luo<sup>6</sup>, Chen Wu<sup>6</sup>,  
7     Yusi Fu<sup>1,\*</sup>, Zhe Zheng<sup>2,\*</sup>, Jianbin Wang<sup>4,\*</sup>, and Yanyi Huang<sup>1,7,8,9,\*</sup>

8  
9     <sup>1</sup> Biomedical Pioneering Innovation Center (BIOPIC) and Beijing Advanced  
10    Innovation Center for Genomics (ICG), School of Life Sciences, Peking University,  
11    Beijing 100871, China.

12    <sup>2</sup> National Clinical Research Center of Cardiovascular Diseases, State Key Laboratory  
13    of Cardiovascular Disease, Fuwai Hospital, National Center for Cardiovascular  
14    Diseases, Chinese Academy of Medical Sciences and Peking Union Medical College,  
15    Beijing 102300, China.

16    <sup>3</sup> Department of Oral Pathology, Peking University School and Hospital of  
17    Stomatology, National Engineering Laboratory for Digital and Material Technology  
18    of Stomatology, and Beijing Key Laboratory of Digital Stomatology, Beijing 100081,  
19    China.

20    <sup>4</sup> School of Life Sciences and Beijing Advanced Innovation Center for Structural  
21    Biology (ICSB), Tsinghua University, Beijing 100084, China.

22    <sup>5</sup> Department of Neurobiology, Capital Medical University, Beijing 100069, China.

23    <sup>6</sup> Department of Etiology and Carcinogenesis, National Cancer Center/Cancer  
24    Hospital, Chinese Academy of Medical Sciences and Peking Union Medical College,  
25    Beijing 100021, China.

26    <sup>7</sup> College of Chemistry and Molecular Engineering, Beijing National Laboratory for  
27    Molecular Sciences, Peking University, Beijing 100871, China.

28    <sup>8</sup> Peking-Tsinghua Center for Life Sciences, Peking University, Beijing 100871,  
29    China.

30    <sup>9</sup> Institute for Cell Analysis, Shenzhen Bay Laboratory, Shenzhen 518132, China.

31    \* Correspondence to: fuyusi.does@gmail.com (Y.F.), zhengzhe@fuwai.com (Z.Z.),  
32    jianbinwang@tsinghua.edu.cn (J.W.), yanyi@pku.edu.cn (Y.H.).

33    # These authors contributed equally to this work.  
34  
35

## 36 **Abstract**

37 Genomic-scale somatic copy number alterations in healthy humans are difficult to  
38 investigate because of low occurrence rates and the structural variations' stochastic  
39 natures. Using a Tn5-transposase assisted single-cell whole genome sequencing  
40 method, we sequenced over 20,000 single lymphocytes from 16 individuals. Then,  
41 with the scale increased to a few thousand single cells per individual, we found that  
42 about 7.5% of the cells had large-size copy number alterations. Trisomy 21 was the  
43 most prevalent aneuploid event among all autosomal copy number alterations, while  
44 monosomy X occurred most frequently in over-30-year-old females. In the  
45 monosomy X single cells from individuals with phased genomes and identified X-  
46 inactivation ratios in bulk, the inactive X Chromosomes were lost more often than  
47 were the active ones.

## 48 **Introduction**

49 Genomic alterations, including copy number alterations (CNAs) and point mutations,  
50 are the major drivers of many cellular malfunctions (Conrad et al. 2010; Sudmant et  
51 al. 2015). Tumor cells, for example, usually carry many CNAs and point mutations  
52 (Beroukhim et al. 2010; Waddell et al. 2015), many of which are oncogenic. After  
53 decades of study, researchers now recognize that point mutations accumulate in  
54 normal cells through polymerase replication errors and damaged DNA. Many point  
55 mutations barely affect cells, while others, located at critical locations, can transform  
56 cells (The Wellcome Trust Case Control Consortium 2010; Klopocki et al. 2011). The  
57 scenario for CNAs in normal cells is less clear. While large CNAs are extremely rare  
58 in humans, thus suggesting their destructive potential in cells (Zhang et al. 2009;  
59 Girirajan et al. 2011; Zarrei et al. 2015), their occurrences in normal cells may have  
60 been underestimated due to technical constraints.

61 Recent advances in single-cell sequencing have greatly extended our understanding of

62 cellular complexity (Vitak et al. 2017; Zahn et al. 2017; Chen et al. 2017). However,  
63 few studies have reported the heterogeneities of nuclear genomic variations in single  
64 cells (Rohrback et al. 2018; Laks et al. 2019). Various technologies have estimated  
65 that the frequencies of somatic CNAs in the human brain vary between 2% and 40%  
66 (McConnell et al. 2013; Cai et al. 2014; Knouse et al. 2014; van den Bos et al. 2016;  
67 Chronister et al. 2019). The current lack of a scalable and robust method to perform  
68 uniform single-cell whole genome amplification (WGA) is the main challenge to  
69 improving the accuracy and precision of somatic CNA identification.

70 In this report, we present a high-throughput single-cell WGA and sequencing method:  
71 Tn5-transposase–assisted single-cell whole genome sequencing (Tasc-WGS). We  
72 demonstrate the power of Tasc-WGS by showing the results of a large scale  
73 investigation that identified rare CNA events in the lymphocytes from 16 cancer-free  
74 individuals of different ages and sexes. We portrayed the CNA pattern of normal  
75 lymphocytes and discovered hot spot regions. Combined with haplotype and  
76 transcriptome data, we were able to reveal the biological bias of aneuploid events in  
77 Chromosome X.

## 78 **Results**

### 79 **A high-throughput pipeline for single-cell somatic CNA analysis**

80 We optimized our Tasc-WGS method by forgoing both pre-amplification and library  
81 quantification, and by directly tagmenting the double-stranded genomic DNA of  
82 single cells, thus greatly simplifying the experimental process and increasing  
83 throughput (**Fig. 1A**). Previous studies had shown that the library construction  
84 protocol performed in a microfluidics system enables uniform amplification of a  
85 single-cell genome (Zahn et al. 2017; Laks et al. 2019). We expanded that protocol to  
86 96-well plates, and our subsequent performance evaluation verified that our protocol  
87 provided even amplification and little contaminated data, as well as a marked increase

88 in throughput that needed no special instrumentation (**Supplementary Fig. S1A, B,**  
89 **C**). We typically processed about 2,000 single cells in a single experimental run and  
90 used cellular barcodes to differentiate each cell's sequence reads (**Table S2**).

91 With a shallow sequencing depth ( $\sim 0.1\times$ ; i.e., 0.3 Gb per cell), we obtained an  
92 average  $3.50\% \pm 1.50\%$  (CI = 95%) genome coverage and detailed copy number  
93 profile with 200-kb bins. The coverage was uniform across the whole genome  
94 (**Supplementary Fig. S1A**), with no crosstalk between samples (**Supplementary Fig.**  
95 **S1B, Supplementary Notes**). We combined circular binary segmentation and hidden  
96 Markov model algorithms to further reduce false identification of unambiguous copy  
97 number losses or gains (**Supplementary Fig. S1D, E, Supplementary Notes**). Most  
98 of the quality filtering of single cell sequencing data was done with combinatorial  
99 criteria, including mean absolute deviation of pairwise difference, degree of ploidy  
100 abnormality, and degree of fragmentation (**Supplementary Fig. S1F, G,**  
101 **Supplementary Notes**).

102 Using a primary tumor sample cell-line and split-cell genome DNA as controls  
103 (**Supplementary Fig. S2**), we further validated the robustness of our Tasc-WGS  
104 protocol. First, we generated 96 libraries of 6-pg bulk, dilute, blood gDNA and then  
105 used it to show that tagmentation reactions and PCR occurred uniformly across the  
106 whole genome (**Supplementary Fig. S2B, C**). To evaluate the sensitivity of Tasc-  
107 WGS, we sequenced both a bulk and 29 single-cell samples of the HEK293 cell line,  
108 subsequently finding our method capable of detecting various types of CNAs ranging  
109 in size from 1 Mb to 26 Mb: CN gains  $\geq 3.0$ , range 3.06–7.91, median = 3.60; copy  
110 number losses  $\leq 1.3$ , range 1.20–1.30, median = 1.28 (**Supplementary Fig. S2D, E**).  
111 To evaluate the specificity of Tasc-WGS, we conducted CNA calling on a GM12878  
112 B-lymphoblastoid cell line. First, bulk DNA genome profiling of GM12878 proved  
113 the diploid karyotype, and then we found some subpopulations with shared CNAs, as  
114 well as some unique CNAs, in the 49 GM12878 single-cell sequences

115 **(Supplementary Fig. S2F)**. Most of those unique CNAs ranged in size from 0.6 Mb  
116 to 10 Mb **(Supplementary Fig. S2G, Table S4)**. So, to examine whether those small  
117 CNAs could have been data point noise mistakenly called by the algorithm, we  
118 simulated normally distributed copy number profiles that had multiple noise levels  
119 (Nilsen et al. 2012, **Supplementary Fig. S3**). As expected, noisier data tended to have  
120 higher false positive (FP) rates and FP CNAs were all small, ranging from 0.6 Mb to  
121 4.8 Mb (mean = 2.3 Mb) **(Table S5)**. Although it is possible that small CNAs (<10  
122 Mb) occurred more because they affected fewer genes and thus affected cell survival  
123 less than larger CNAs do, it is hard to distinguish between true- and false-positive  
124 calls of small CNAs. Therefore, for the lymphocyte samples, we decided to include  
125 only CNA calls larger than 2 Mb.

#### 126 **Somatic CNA events occurred commonly in lymphocytes**

127 We examined 33,600 single lymphocytes sorted from the blood of 16 cancer-free  
128 individuals (10 males and 6 females; 1,440–3,840 single lymphocytes per individual)  
129 aged 9 months to 80 years **(Fig. 1B, Table S1)**. Among them, 31,125 cells (92.6%)  
130 had more than 0.3 million reads aligned to the reference genome, and 20,594 cells  
131 (61.3%) passed the aforementioned quality filtering criteria for CNA analyses **(Fig.**  
132 **1C, Supplementary Fig. S4A–E, Supplementary Notes)**.

133 We found somatic CNA-containing lymphocytes in all individuals and identified  
134 4,809 cells (24.0% on average, 12.9%–44.5% for different individuals) harboring  
135 small CNAs (2–10 Mb) and 1,500 cells (7.3% on average, 3.3%–15.2% for different  
136 individuals) harboring large CNAs (>10 Mb) **(Fig. 1D, Supplementary Fig. S4F)**.  
137 Furthermore, we observed a few cells, from different individuals, that carried similar  
138 CNAs. Some other cells carried multiple CNAs across the whole genome **(Fig. 1D)**.  
139 As in previous reports (Knouse et al. 2016), copy number deletions occurred much  
140 more often than did copy number amplifications **(Supplementary Fig. S4G, H)**, and

141 the ratios of CNA-containing cells were similar between males and females  
142 (**Supplementary Fig. S4I**). Because large CNAs may affect more genes and cause  
143 more serious problems than small CNAs, we focused on the large somatic CNAs  
144 (excluding Chromosome Y due to technical challenges) that we had identified in  
145 1,397 lymphocytes.

146 We examined a large number of cells to minimize sampling error and to accurately  
147 assess the ratio of CNA-containing lymphocytes. To that end, we ran a simulation to  
148 determine the optimal number of cells that had to be sequenced to accurately assess  
149 the ratio of CNA-containing cells, and found that a smaller sample invariably yields  
150 uncertain assessment results (**Fig. 1E**). A throughput of about 1,000 or more cells per  
151 sample was ideal to achieve a coefficient of variation (CV) below 20%, and thus  
152 accurate CNA assessment with occurrence ratios less than 10%. We then checked  
153 whether those somatic, megabase-size CNAs in lymphocytes were age related  
154 (Machiela et al. 2015; Vattathil et al. 2016), and found a relatively weak correlation  
155 (**Fig. 1F**). All our observations suggested that CNAs were common in lymphocytes of  
156 cancer-free individuals.

### 157 **Large-size autosomal somatic CNAs occurred randomly in lymphocytes**

158 We further analyzed CNA profile similarities between cells to try to capture clonal  
159 amplification signatures. Dimension-reduction analysis of single-cell copy number  
160 profiles produced a few clusters based on large-CNA patterns (**Fig. 2A**,  
161 **Supplementary Fig. S5A, Supplementary Notes**). Chromosome 21 and Chr X  
162 CNAs separated from the others, mostly because of their distinct aneuploidy patterns,  
163 but we observed no other obvious clustering based on sex, sample, or chromosome  
164 (**Supplementary Fig. S5A**). Using pairwise Euclidean distances of CNA profiles, we  
165 found 51 cell clusters, all with potential clonal cell amplifications (**Fig. 2B–D**,  
166 **Supplementary Fig. S5B, Supplementary Notes**). Although clonal amplifications

167 among lymphocytes are not common (cell ratio = 2.3%, median clone size = 4), we  
168 found that most individuals (8/10 males and 6/6 females) exhibited such events, with  
169 clone sizes ranging from 3 to 105 cells. Aside from the characteristic aneuploid clones  
170 of Chr 21- and Chr X-containing cells, the largest clone, in F01's Chromosome 6,  
171 contained 11 cells with an approximate 35 Mb loss (**Fig. 2E**).

172 Somatic CNA events were scattered across every chromosome (**Fig. 2F**), although all  
173 CNAs together could cover almost the entire genome (99.4%). For each genomic  
174 locus that contained CNA events, the occurrence frequency was less than 1% (0.0%–  
175 1.0%), except for Chr X (1.3%–1.8%) (**Supplementary Fig. S5C**). We detected no  
176 shared CNA hotspots among the participants, and CNA distributions were no different  
177 than a random distribution (**Fig. 2G**), except for the obviously higher frequencies at  
178 Chrs 21 and X. In keeping with the random generation mechanism, longer  
179 chromosomes contained proportionally more CNAs than shorter ones did (in a linear  
180 relationship, **Fig. 3A**), while Chr 21 and Chr X exhibited significantly higher  
181 occurrence rates than other chromosomes. We then examined whether certain  
182 chromosomes were more prone to CNAs than others and found that, except for Chr X  
183 and Chr 21, all other autosomes showed similar CNA count densities (**Fig. 3B**,  
184 **Supplementary Fig. S5D**).

185 CNA size distribution showed that copy number amplifications affect larger CNAs  
186 more than do deletions and they were usually aneuploidies (**Supplementary Fig.**  
187 **S6A**). Specifically, excepting Chr 21, 57.6% (38/66) of the autosomal copy number  
188 amplifications were aneuploidies, while only 2.0% of the deletions were (22/1123)  
189 (**Supplementary Fig. S6B, C**). These results suggest that the mechanism for copy  
190 number gain may be different than that for loss.

### 191 **Aneuploidy occurred mainly at Chr 21 and the sex chromosomes**

192 We identified somatic aneuploidy in almost all chromosomes, but with a 2.4% (n =

193 498) cellular occurrence rate, it can be easily missed if the experimental throughput is  
194 not large enough. We verified low-frequency autosomal aneuploidy using  
195 fluorescence in situ hybridization assays, and quantitatively confirmed the copy  
196 number gains and losses in Chr 3, 8, 13, 18, 21 and X (**Supplementary Fig. S5E**,  
197 **Table S3**).

198 Among all the aneuploid cells, aneuploidy in Chr X predominated (35 gains and 235  
199 losses, 52.5% of the total events), followed by Chr 21 (48 gains and 21 losses, 13.4%  
200 of the total events) (**Supplementary Fig. S6D**). The remaining 60 cells contained  
201 11.6% of the total aneuploidy events (38 gains and 22 losses).

202 Chromosome 21 had about half of the autosomal aneuploidy events (**Supplementary**  
203 **Fig. S6E**), with more gains than losses. We noticed that Chr 21 aneuploidy occurred  
204 unevenly among individuals (**Supplementary Fig. S6F**), as M10 showed a  
205 significantly higher ratio of trisomy 21 (2.5% versus 0.2%) than other individuals did.  
206 Among all individuals, trisomy 21 occurred more in males than in females  
207 (**Supplementary Fig. S6F**), but monosomy 21 occurred equally between males and  
208 females (**Supplementary Fig. S6G**).

209 The aneuploidy occurrence rate for Chr X (270 cells, 1.31% in total) was significantly  
210 higher than that of the other chromosomes, contributing to 72.2% of the cells with  
211 CNAs >10 Mb (374 cells) (**Supplementary Fig. S6H**). Although all male Chr X  
212 aneuploid cells ( $n = 15$ ) were disomic, the majority of Chr 21 aneuploidy events were  
213 monosomic (235 cells, 87.0%) and occurred mostly in females (255 female cells, 15  
214 male cells, **Supplementary Fig. S6H**). Such Chr X loss is prevalent in females  
215 aged > 30 years (228 cells), but is rarely discovered in young females (7 cells).

216 Identifying aneuploidy events in Chr Y was challenging because of its short unique  
217 genomic regions (~17 Mb). Therefore, we relied on reads counts, instead of copy  
218 number estimations, to deduce Chr Y ploidy number, subsequently identifying 115



219 male cells with Chr Y loss (0.9% of all male cells). To verify the reliability of this  
220 assessment, we used reads counts to analyze Chr X and Chr 21 aneuploidy and  
221 compared those results with the previous ones (**Fig. 3C–F**). The reads count  
222 distribution had a clear linear relationship among monosomic, normal, and trisomic  
223 cells, and almost all the results were consistent with the bin-based method (98.37%).

#### 224 **Loss of heterozygosity and allelic bias in copy number alterations**

225 Using phased, personalized genomic information from F03 and F06 (**Fig. 4A,**  
226 **Supplementary Notes**), we investigated whether somatic CNA events were allele  
227 specific. We analyzed all copy neutral chromosomes (CN = 2) in 2,668 cells from F03  
228 and F06 and found only 4 cells (2 from F03 and 2 from F06, 0.1% and 0.2% per  
229 individual, respectively) contained copy neutral loss of heterozygosity events in  
230 Chromosomes 1, 14, 21, and 22 (**Fig. 4B**). We then focused on CN = 1 genomic  
231 regions, within which the allelic pattern should have been either single parental or  
232 segmental. Of the 72 CN = 1 events that we analyzed, 70 (97.2%) were single  
233 parental and the other two had shuffled genotypes without segmental patterns (**Fig.**  
234 **4C–E, Supplementary Fig. S7**), likely due to the low probability of collision  
235 between a CNA occurrence and recombination.

236 We next examined whether monosomy X cells were parentally biased during  
237 chromosome loss, and found most of the F03 monosomic X lymphocytes (86.2%,  
238 25/29 cells) were maternal, while most of the affected F06 monosomic X  
239 lymphocytes were paternal (86.0%, 37/43 cells) (**Fig. 4C–E, Supplementary Fig.**  
240 **S7**). To exclude possible technical artifacts and contamination, we calculated the  
241 single-nucleotide polymorphism (SNP) density ratio between Chromosome X and  
242 Chromosome 10 and found that the ratio distributions for both normal and monosomy  
243 X cells were similar (**Fig. 4F**). However, when calculating the normalized reads  
244 numbers, we found that the distribution of reads ratio between Chr X and 10 for

245 normal cells was similar, but it was inconsistent for monosomic cells, as only half the  
246 reads mapped to Chr X (**Fig. 4G**).

247 To examine whether parental preference in Chr X loss might correlate with Chr X  
248 inactivation, we conducted bulk RNA-seq, based on phased SNPs, to determine F03's  
249 allele-specific expression across her whole genome (**Supplementary Notes**). As  
250 expected, autosomal genes expressed unbiased biallelic expression (**Fig. 4H**,  
251 **Supplementary Fig. S7**), but Chr X expression was greatly biased toward the  
252 maternal allele, coincident with the fact that the Chr X loss in F03 was mainly  
253 paternal (**Fig. 4C, D**).

## 254 **Discussion**

255 In this study, we used high-throughput Tasc-WGS to profile CNA landscapes of more  
256 than 20,000 single lymphocytes sampled from 16 individuals. Even though CNAs  
257 were detected in blood lymphocytes of every donor, the occurrence rate of CNAs >10  
258 Mb for each individual was rather low and correlated little to age. Such low-  
259 frequency events can be accurately identified only by profiling thousands of single  
260 cells per person; and from the technological perspective, the scalability of single-cell  
261 WGS is key to enabling such observations. Additionally, a benefit of large-scale high-  
262 performance single-cell sequencing libraries is that we can use them to identify rare  
263 CNA events at high resolution, a formerly impractical achievement using other  
264 throughput-limited single-cell WGA methods, or by using bulk samples.

265 We found that CNAs, including the large ones (>10 Mb), were widely distributed  
266 throughout the lymphocyte genomes; thus revealing that, on average, about 5% of the  
267 lymphocytes of a healthy human have large CNAs. Also, losses were more prevalent  
268 than gains, thus suggesting that losses occur more readily than gains do. Previous  
269 studies of neurons showed a similarly scattered CNA pattern throughout the genome  
270 (Cai et al. 2014; Chronister et al. 2019). Some researchers think that the activity of

271 mobile elements, like that of the active long interspersed nuclear element 1 during  
272 brain development, is a major cause of CNAs (Evrony et al. 2015; Sanchez-Luque et  
273 al. 2019; Richardson et al. 2014; Erwin et al. 2016). However, unlike that of neurons,  
274 the lymphocyte regeneration rate is high, and CNAs harbored in precursor cells may  
275 pass to descendent cells via cell differentiation or division. Indeed, most CNA-  
276 containing cells are not clonal—we observed only 51 clones in our 20,594-cell  
277 sample. In terms of the number of cells, the sizes of these clones were insignificant,  
278 thus indicating that rather than being generated in the early developmental stages,  
279 they were newly generated. Lymphocytes can expand through mitosis, so some low-  
280 frequency CNA events may be inherited.

281 The CNAs seemed to occur in no particular location across the genome, except in  
282 Chromosomes 21, X, and Y, where most of the aneuploidies were found. Most  
283 segmental CNAs were randomly scattered across the whole genome, but whole-  
284 chromosome CNAs likely affected many genes, either by completely silencing or  
285 altering their expression levels (Zhang et al. 2009; Girirajan et al. 2011). As a result,  
286 aneuploidies are lethal in most cases (Hassold et al. 2001; Santaguida et al. 2015).  
287 However, 2.4% of the cells in our study had aneuploid events, especially at Chr 21,  
288 which displayed trisomy, the most prevalent human aneuploidy (Sanchez-Luque et al.  
289 2019; Richardson et al. 2014). This consistency suggests similar selection outcomes  
290 for aneuploid events in both humans and lymphocytes.

291 Aneuploidy occurs more in sex chromosomes than in autosomes. Although our results  
292 showed a weak correlation of age with CNA occurrence, monosomy X is rare in  
293 young females but becomes more prevalent in females over age 30, for whom the rate  
294 can reach 2%–7%. Such a chromosome loss was parentally allele specific in the  
295 affected individuals. According to haplotype information and bulk RNA-seq data, we  
296 found that most lost X Chromosomes were inactive (Xi). These results agree with  
297 previous studies that suggested that the X inactivation skewness pattern is more

298 prevalent in older than in younger individuals (Sharp et al. 2000; Sandovici et al.  
299 2004; Amos-Landgraf et al. 2006; Machiela et al. 2016; Zito et al. 2019). This  
300 association may be due to the lethality of a lost active X, so most monosomy X cells  
301 are missing Xi because negative selection assumes a randomly generated loss during  
302 mitosis. Unlike the high incidence of monosomy X cells, trisomy X cells are rarely  
303 found. This imbalance further suggests that Chromosome X aneuploidy likely does  
304 not result from simple uneven separation during mitosis. Additionally, compared with  
305 autosomal aneuploidies, Xi loss is both non-lethal to affected cells and under positive  
306 selection. Therefore, we observed a higher incidence of monosomy X cells than cells  
307 with autosomal events. Another possible contributing factor is that conformational  
308 changes to Xi may ease its loss during mitosis (Galupa et al. 2018). Obviously, more  
309 investigation is needed to clarify the mechanisms of these phenomena.

310 Our results demonstrate how shallow WGS, after extending throughput to 1,000  
311 single cells, enables quantitative identification of rare copy number change events.  
312 However, the sensitivity of CNA detection was limited in this study because, although  
313 it performs better than most other existing methods, Tasc-WGS harbors intrinsic  
314 coverage noise due to amplification bias and coverage stochasticity. To lower that  
315 false positive CNA identification rate, we applied strict criteria to screen such events,  
316 even though it caused us to lose some sensitivity and resolution. Studies of cancers  
317 (Beroukhim et al. 2010; Navin et al. 2011; Jacobs et al. 2012; Laurie et al. 2012) and  
318 neuronal disorders (van den Bos et al. 2016; Yurov et al. 2007; Bundo et al. 2014)  
319 would benefit from the ability to identify smaller CNAs, but improvements of both  
320 experimental protocols and computational algorithms are needed. For instance, the  
321 commonly used data processing pipelines for determining copy number are based on  
322 bulk sequencing or micro-array data, not single-cell data. With the popularity of  
323 single-cell profiling and the availability of more data, such as ours, a need for more  
324 appropriate computational approaches must be met soon.

325

## 326 **Methods**

### 327 Ethics approval

328 This study was approved by the Ethics Committee of Tsinghua University (No.  
329 20180011), Ethics Committee of the Cancer Hospital, the Chinese Academy of  
330 Medical Sciences and Peking Union Medical College (No. NCC2017G-002), and the  
331 Ethics Committee of Fuwai Hospital, Chinese Academy of Medical Sciences and  
332 Peking Union Medical College (No. 2017-880).

### 333 Patients and clinical samples

334 We recruited Fuwai Hospital patients who had cardiovascular diseases, as well as  
335 their visiting family members. A single patient with colon cancer was enrolled  
336 through the Cancer Hospital. Patients and family members were given full research  
337 program descriptions, which included potential risks. We obtained informed consent  
338 from all patients and family members before genetic testing, and then collected fresh  
339 blood samples from both healthy donors (M01-M03, F03-F06) and cardiovascular  
340 disease patients (M04-M10, F01, F02), as well as a tumor sample from the cancer  
341 patient after surgery.

### 342 Peripheral blood mononuclear cell isolation and single-cell sorting

343 We used Ficoll-Paque PLUS (Cytiva, #17-1440-02) according to the manufacturer's  
344 instructions to isolate mononuclear cells from fresh blood samples. Briefly, for each  
345 sample, Ficoll-Paque medium (3 ml) was added to a 15-mL centrifuge tube and then a  
346 blood sample (2 mL) diluted 1:1 in phosphate buffered saline (PBS) was carefully  
347 layered onto the Ficoll-Paque medium. The tube was then centrifuged at 400g for 30  
348 min at room temperature. The second layer, which contained mononuclear cells, was

349 pipetted out, transferred to a new tube, and washed twice in 10 mL PBS before being  
350 resuspended in 1 mL PBS- bovine serum albumin (BSA) buffer. Typically, we isolated  
351  $1 \times 10^6$  cells from each sample. We then used a FACSAria III sorter (BD  
352 Biosciences), gated for lymphocytes and singlets, to sort out single cells according to  
353 forward and side scatter signals. We then placed each sorted, single cell directly into 2  
354  $\mu$ l lysis buffer (30 mM Tris-HCl [pH = 8.0], 10 mM NaCl, 0.2  $\mu$ L Proteinase K  
355 [Qiagen, #19133], 5 mM EDTA, and 0.5% Triton X-100 [Sigma-Aldrich, #T9284]) in  
356 a well of a 96-well plate.

### 357 Single-cell isolation from a tumor tissue

358 We ground the colorectal cancer sample ( $\sim 0.1 \text{ cm}^3$ ) using a dounce glass tissue  
359 grinder. The cells were then washed, resuspended in PBS, and filtered through a  
360 Falcon 40- $\mu$ m cell strainer. They then underwent fluorescence-activated cell sorting  
361 (FACS), gated for single-cells, and each cell was sorted into a well in a 96-well plate.

### 362 Culturing and isolating single cells and optimizing cell lines

363 We used GM12878 cells (Coriell Institute) and HEK293 cells (American Type  
364 Culture Collection) for protocol optimization. Those cells were cultured at 37 C°  
365 under 5% CO<sub>2</sub> in a humidified incubator. We cultured GM12878 cells in RPMI 1640  
366 medium (Gibco, #C11875500BT) with 10% fetal bovine serum (Gibco, #10100147)  
367 and 1% penicillin–streptomycin (Gibco, #15140122), then spun the cell suspension at  
368 500g for 5 min, discarded the supernatant, and washed the cell pellet twice using PBS  
369 before resuspending it in PBS with 1% BSA. We cultured HEK293 cells in DMEM  
370 medium (Gibco, #11965092) with 10% fetal bovine serum and 1% penicillin–  
371 streptomycin. The cells were then washed twice using PBS, detached by adding 1 mL  
372 0.25% trypsin-EDTA (Gibco, #25200056) to their culture dish, centrifuged at 500g for  
373 5 min, and recovered in 1% PBS-BSA buffer. All cells underwent FACS that was  
374 gated for single-cells and each cell was subsequently sorted to a well in a 96-well

375 plate.

### 376 Purification of genomic DNA

377 We purified genomic DNA (gDNA) using a Genomic DNA Purification Kit (Thermo  
378 Fisher Scientific, #K0512) according to the manufacturer's instructions. We then  
379 quantified that DNA with a Qubit fluorometer system (Invitrogen) and diluted it to 6  
380 pg/ $\mu$ L.

### 381 Single-cell whole genome amplification and sequencing

382 The 96-well plates were then centrifuged at 2,000g for 1 min and a lysis reaction  
383 proceeded at 50 °C for 3 h. We added tagmentation buffer (1x TD buffer, 0.015  $\mu$ L  
384 TTE Mix V50 [Vazyme, #TD501], 0.625x protease inhibitor cocktail [Promega,  
385 #G6521], and 1 mM MgCl<sub>2</sub>) to reach a volume of 10  $\mu$ L per well and then incubated  
386 the plates at 55 °C for 1 h. Tagmented DNA fragments were amplified by adding 12  
387  $\mu$ L PCR master mix composed of 11  $\mu$ L Q5 High-Fidelity 2x Master Mix (New  
388 England Biolabs, #M0492) and 0.5  $\mu$ L each of 10 mM Nextera i5 and i7 index  
389 primers. PCR thermocycling conditions were 72 °C for 8 min, 98 °C for 30 s, 24  
390 cycles of 98 °C for 15 s each, 60 °C for 30 s, and 72 °C for 90 s, with a final  
391 incubation at 72 °C for 5 min. The subsequent PCR products were merged in groups  
392 of 5 plates (480 single-cell wells) and then purified using 1x VAHTS DNA clean  
393 beads (Vazyme, #N411). Library quality control was conducted on a 5200 Fragment  
394 Analyzer System (Agilent, #M5310AA) to determine fragment distribution, and then  
395 qualified libraries were quantified and sequenced on a HiSeq X Ten System (Illumina)  
396 following the manufacturer's standard protocols.

### 397 Bioinformatic analyses

398 *Data processing*

399 Paired-end reads were aligned to the human reference genome (hg38) using nvBowtie  
400 (<https://github.com/NVlabs/nvbio>), a graphics processing unit-accelerated version of  
401 Bowtie 2 (Langmead et al. 2009). Then, each cell's mapped reads were demultiplexed  
402 using perfectly matched cell barcodes. Typically, 0.3 million reads were sufficient for  
403 copy number profiling at a 200-kb resolution. Before downstream analysis, we  
404 excluded cells with less than 0.3 million reads, keeping reads mapped with minimum  
405 mapping quality scores of 20, and removed PCR duplicates using SAMtools (Li et al.  
406 2009).

#### 407 *Copy number profiling and quality control*

408 We applied two methods, HMMcopy (Shah et al. 2006) and DNACopy (Olshen et al.  
409 2004), to calculate the copy number profiles of each sample at the 200-kb resolution,  
410 with GC content and mappability normalized. Both algorithms are commonly used in  
411 single cell studies, but they each give different identification results for small size  
412 variations (Knouse et al. 2016). HMMcopy uses a hidden Markov model (HMM) to  
413 determine copy number, while DNACopy applies circular binary segmentation (CBS)  
414 for analysis. We combined the two methods to further increase the specificity and  
415 accuracy of CNA identification.

416 We used the Bayesian information criterion as a metric to evaluate model fitness with  
417 different computational parameters in HMMcopy and DNACopy calculations, using  
418 the strictest parameters ( $\alpha = 10^{-4}$  for DNACopy and  $e = 0.9999$  for HMMcopy)  
419 under the same fitness to enhance CNA calling specificity.

420 After segmentation, we used three features to assess the quality of the single cell  
421 sequencing results, and then filtered out low-quality cells and incorrect segmentation  
422 calls. First, we checked the average of all copy numbers identified in each bin (degree  
423 of ploidy abnormality), and that value was greatly influenced by cell ploidy. Cells  
424 with abnormal ploidy at the whole genome level (ploidy > 3) were discarded. We then



425 checked the median absolute pairwise difference (MAPD), typically used for  
426 indicating amplification evenness, to rule out poorly amplified cells (MAPD > 0.6).  
427 Finally, we checked each cell's number of segments. We noticed that some cells  
428 exhibited acceptable MAPD values but had fragmented copy number profiles. This  
429 could have been caused by incomplete lysis, contamination from other cells or cell  
430 debris, or during the S-phase, as some studies have suggested (Laks et al. 2019; Chen  
431 et al. 2017). Since cells with a CNA or a fragmented chromosome will have more  
432 segments and slightly higher MAPD values than would normal cells, the other  
433 genomic regions of those cells are still high quality. So, we then calculated the  
434 number of segments (degree of fragmentation) and MAPD for each chromosome and  
435 used the third highest values to represent each cell's value.

#### 436 *Identification of copy number alteration events*

437 We identified each CNA by combining the two algorithms, CBS and HMM, and  
438 keeping the double-positive counts as true events. Since both algorithms are sensitive  
439 to the local contents of copy number profiles (Knouse et al. 2016; Zhang et al. 2015),  
440 especially for losses, we developed a shuffling pipeline to improve the confidence of  
441 identifying CNA events.

442 For each cell with CNAs, segments with amplification or deletion were shuffled  
443 throughout the genome and were re-identified by CBS and HMM algorithms. We  
444 identified CNA events with high confidence by repeating the shuffle process 20 times  
445 and averaging the copy number values identified for a given shuffled segment. A loss  
446 was defined as a segment with a copy number value less than 1.4. Only those CNAs  
447 larger than 2 Mb were kept for downstream analysis.

448 To avoid false identification affected by mapping uniqueness, we ruled out those  
449 CNAs either located near centromeres (overlapping more than 40%) or with disperse  
450 copy number profiles (with larger deviations [mean or median > 0.4]) between the

451 copy number values of bin and segment, usually at the chromosome ends).

#### 452 *Simulation of CNA profiles*

453 Since bins of CNA profiles are normally distributed (Nilsen et al. 2012), we generated  
454 normally distributed simulated CNA data to investigate false positive (FP) calls  
455 introduced by the algorithm. We set  $\sigma$  values to range from 0.4 to 0.8 and then  
456 generated 1,000 simulated CNA profiles for each  $\sigma$ , replicating the process three  
457 times. We then adopted the same CNA calling pipelines and counted the FP CNA  
458 events in each batch.

#### 459 *Estimating the coefficient of variation of CNA identification*

460 Large CNAs are rare events and vulnerable to sampling errors. Therefore, we  
461 simulated the sampling process by sampling different numbers of cells (sample size,  
462 from 3 to  $10^5$ ) from  $10^6$  cells having different ratios of CNA-containing cells (from  
463 0% to 20%). We repeated each test 100 times to determine sufficient sample size and  
464 then calculated the coefficient of variation (CV) for each condition.

#### 465 *Clone identification*

466 We first used dimension reduction to view all the cells with >10 Mb of CNAs. First,  
467 CNA profiles having 200-kb resolutions were smoothed using a 4-Mb window; and  
468 then, using multidimensional scaling, they were transformed into a low-dimensional  
469 representation. We adjusted the number of dimensions representing each chromosome  
470 (each dimension represents ~10-Mb CNA profiles) and concatenated all  
471 chromosomes. Then, we were able to visualize low-dimensional representations of  
472 CNA profiles in 2-dimensions by using *t*-stochastic neighbor embedding.

473 We identified clonal CNAs by calculating the relative CNA ratio in every  
474 chromosome for every individual. Specifically, for each individual, we calculated

475 either the fraction or the number of CNAs in each chromosome to represent the  
476 enrichment of CNAs in each, and then normalized those values based on chromosome  
477 lengths.

478 To further investigate the clonal CNAs, we calculated the Euclidean distance between  
479 cells for every individual and identified similar cell pairs according to their distance  
480 distributions. We then constructed an undirected graph using cells as nodes and the  
481 Euclidean distances as edges and identified clones as maximally connected subgraphs.

#### 482 *Haplotype calling*

483 We first genotyped genome sequencing data on all loci of the whole genome with the  
484 same pipeline. Reads were first trimmed and filtered using the following criteria. The  
485 adaptors were removed according to the reverse complementary sequence of the  
486 paired-end reads, and filtered reads were dynamically trimmed with a Phred cutoff of  
487 20. The remaining reads were then mapped to the human reference genome using  
488 Bowtie 2 (MapQ  $\geq$  40, XM < 4), and whole genome genotypes were called using the  
489 UnifiedGenotyper mode of GATK-3.5 (DePristo et al. 2011). We performed  
490 heterozygosity analysis with a minor allele frequency cutoff between 30%–50% and  
491 with 0%–20% homozygosity. Variant call format (VCF) files of three sample  
492 genotypes were merged into one VCF file, and heterozygous loci of those three  
493 samples were extracted into a locus file as a union for VCF scanning. Only those loci  
494 from which either the mother is heterozygous and father homozygous or the father is  
495 heterozygous and mother homozygous were used to phase the child's haplotype.

#### 496 *Analysis of Chr X*

497 For each single cell from F03 and F06, reads with single-nucleotide polymorphisms  
498 (SNPs) were identified using SAMtools (base quality > 30). Then, the haplotype for  
499 each SNP was labeled as paternal, maternal, or neither (likely due to sequencing

500 error) using the haplotype map. Haplotype counts for each bin were the sums of every  
501 SNP site in that bin. For monosomy X cells, SNPs in every bin within segments that  
502 identified a loss, were summarized and identified as paternal, maternal, or  
503 undetermined (binomial test,  $p < 0.001$ ).

#### 504 *Analysis of Chromosome Y*

505 Since Chr Y had few uniquely mapped reads, we had to develop a special method to  
506 determine its copy number. Reads coverage of Chr 21, X, and Y were calculated by  
507 SAMtools normalized by sequencing depth, and then cells with Chr 21 and Chr X  
508 aneuploidies were identified by coverage depth. If we calculated the percentage of  
509 sequenced reads belonging to Chr 21 or Chr X of each single cell, we could also  
510 easily identify cells with normal or altered copy numbers in those two chromosomes.  
511 Actually, we found that more than 98% of those results were consistent with the  
512 results determined by coverage depth. We then applied our percentage classification  
513 method to identify the Chr Y copy number for each single cell.

514

#### 515 **Data access**

516 The whole-genome and RNA-seq data generated in this study are deposited in the  
517 Genome Sequence Archive (GSA; <https://ngdc.cnbc.ac.cn/gsa-human>) in National  
518 Genomics Data Center, China National Center for Bioinformation / Beijing Institute  
519 of Genomics, Chinese Academy of Sciences under accession number HRA001513.  
520 The scripts generated for the bioinformatics analysis are available in the Supplemental  
521 Code.

522

#### 523 **Acknowledgements**

524 We thank Chenyang Geng from the Peking University High-throughput Sequencing

525 Center and Biomedical Pioneering Innovation Center, and Fei Wang from the  
526 National Center for Protein Sciences (Peking University) for the experimental  
527 assistance. This project was supported by National Key R&D Program of China  
528 (2018YFA0108100 to Y.H.), National Natural Science Foundation of China  
529 (22050002 to Y.H.), Beijing Municipal Science and Technology Commission  
530 (Z201100005320016 to Y.H.), Beijing Advanced Innovation Center for Genomics,  
531 and Shenzhen Bay Laboratory.

532

### 533 **Author Contributions**

534 Y.H., J.W., and Z.Z. conceived the study; L.L., H.C., J.Z., L.D., J.S., and S.G.  
535 performed experiments; H.C., L.L. and M.D. performed data analyses; Y.F., L.L., L.D.,  
536 and H.C. developed the Tasc-WGS protocol; C.S., J.W., and Y.L provided clinical  
537 samples; L.L., H.C., Y.H., and J.W. wrote the manuscript with inputs from all authors;  
538 Y.H., J.W., and Z.Z. supervised all aspects of this study.

539

### 540 **Competing Interests**

541 Authors declare no competing interests.

542

### 543 **References**

544 Amos-Landgraf JM, Cottle A, Plenge RM, Friez M, Schwartz CE, Longshore J,  
545 Willard HF. 2006. X Chromosome–inactivation patterns of 1,005  
546 phenotypically unaffected females. *The American Journal of Human Genetics*  
547 **79**: 493-499.

548 Beroukhim R, Mermel CH, Porter D, Wei G, Raychaudhuri S, Donovan J, Barretina  
549 J, Boehm JS, Dobson J, Urashima M et al. 2010. The landscape of somatic  
550 copy-number alteration across human cancers. *Nature* **463**: 899-905.

- 551 Bundo M, Toyoshima M, Okada Y, Akamatsu W, Ueda J, Nemoto-Miyauchi T,  
552 Sunaga F, Toritsuka M, Ikawa D, Kakita A et al. 2014. Increased L1  
553 retrotransposition in the neuronal genome in schizophrenia. *Neuron* **81**: 306-  
554 313.
- 555 Cai X, Evrony GD, Lehmann HS, Elhosary PC, Mehta BK, Poduri A, Walsh CA.  
556 2014. Single-cell, genome-wide sequencing identifies clonal somatic copy-  
557 number variation in the human brain. *Cell reports* **8**:1280-1289.
- 558 Chen C, Xing D, Tan L, Li H, Zhou G, Huang L, Xie XS. 2017. Single-cell whole-  
559 genome analyses by Linear Amplification via Transposon Insertion (LIANTI).  
560 *Science* **356**: 189-194.
- 561 Chronister WD, Burbulis IE, Wierman MB, Wolpert MJ, Haakenson MF, Smith AC,  
562 Kleinman JE, Hyde TM, Weinberger DR, Bekiranov S et al. 2019. Neurons  
563 with complex karyotypes are rare in aged human neocortex. *Cell reports*. **26**:  
564 825-835.
- 565 Conrad DF, Pinto D, Redon R, Feuk L, Gokcumen O, Zhang Y, Aerts J, Andrews TD,  
566 Barnes C, Campbell P et al. 2010. Origins and functional impact of copy  
567 number variation in the human genome. *Nature* **464**: 704-712.
- 568 DePristo MA, Banks E, Poplin R, Garimella KV, Maguire JR, Hartl C, Philippakis  
569 AA, Del Angel G, Rivas MA, Hanna M et al. 2011. A framework for variation  
570 discovery and genotyping using next-generation DNA sequencing data. *Nature*  
571 *genetics* **43**: 491-498.
- 572 Erwin JA, Paquola AC, Singer T, Gallina I, Novotny M, Quayle C, Bedrosian TA,  
573 Alves FI, Butcher CR, Herdy JR et al. 2016. L1-associated genomic regions are  
574 deleted in somatic cells of the healthy human brain. *Nature neuroscience* **19**:  
575 1583-1591.
- 576 Evrony GD, Lee E, Mehta BK, Benjamini Y, Johnson RM, Cai X, Yang L, Haseley P,  
577 Lehmann HS, Park PJ et al. 2015. Cell lineage analysis in human brain using  
578 endogenous retroelements. *Neuron* **85**: 49-59.

- 579 Galupa R, Heard E. 2018. X-chromosome inactivation: a crossroads between  
580 chromosome architecture and gene regulation. *Annual review of genetics* **52**:  
581 535-566.
- 582 Girirajan S, Campbell CD, Eichler EE. 2011. Human copy number variation and  
583 complex genetic disease. *Annual review of genetics* **45**: 203-226.
- 584 Hassold T, Hunt P. 2001. To err (meiotically) is human: the genesis of human  
585 aneuploidy. *Nature Reviews Genetics* **2**: 280-291.
- 586 Jacobs KB, Yeager M, Zhou W, Wacholder S, Wang Z, Rodriguez-Santiago B,  
587 Hutchinson A, Deng X, Liu C, Horner MJ et al. 2012. Detectable clonal  
588 mosaicism and its relationship to aging and cancer. *Nature genetics* **44**: 651-  
589 658.
- 590 Klopocki E, Mundlos S. 2011. Copy-number variations, noncoding sequences, and  
591 human phenotypes. *Annual review of genomics and human genetics* **12**:53-72.
- 592 Knouse KA, Wu J, Amon A. 2016. Assessment of megabase-scale somatic copy  
593 number variation using single-cell sequencing. *Genome research* **26**: 376-384.
- 594 Knouse KA, Wu J, Whittaker CA, Amon A. 2014. Single cell sequencing reveals low  
595 levels of aneuploidy across mammalian tissues. *Proceedings of the National*  
596 *Academy of Sciences* **111**: 13409-13414.
- 597 Laks E, McPherson A, Zahn H, Lai D, Steif A, Brimhall J, Biele J, Wang B, Masud  
598 T, Ting J et al. 2019. Clonal decomposition and DNA replication states defined  
599 by scaled single-cell genome sequencing. *Cell* **179**: 1207-1221.
- 600 Langmead B, Trapnell C, Pop M, Salzberg SL. 2009. Ultrafast and memory-efficient  
601 alignment of short DNA sequences to the human genome. *Genome biology* **10**:  
602 1-10.
- 603 Laurie CC, Laurie CA, Rice K, Doheny KF, Zelnick LR, McHugh CP, Ling H,  
604 Hetrick KN, Pugh EW, Amos C et al. 2012. Detectable clonal mosaicism from  
605 birth to old age and its relationship to cancer. *Nature genetics* **44**: 642-650.

- 606 Li H, Handsaker B, Wysoker A, Fennell T, Ruan J, Homer N, Marth G, Abecasis G,  
607 Durbin R. 2009. The sequence alignment/map format and SAMtools.  
608 *Bioinformatics* **25**: 2078-2079.
- 609 Machiela MJ, Zhou W, Karlins E, Sampson JN, Freedman ND, Yang Q, Hicks B,  
610 Dagnall C, Hautman C, Jacobs KB et al. 2016. Female chromosome X  
611 mosaicism is age-related and preferentially affects the inactivated X  
612 chromosome. *Nature communications* **7**: 1-9.
- 613 Machiela MJ, Zhou W, Sampson JN, Dean MC, Jacobs KB, Black A, Brinton LA,  
614 Chang IS, Chen C, Chen C et al. 2015. Characterization of large structural  
615 genetic mosaicism in human autosomes. *The American Journal of Human*  
616 *Genetics* **96**: 487-497.
- 617 McConnell MJ, Lindberg MR, Brennand KJ, Piper JC, Voet T, Cowing-Zitron C,  
618 Shumilina S, Lasken RS, Vermeesch JR, Hall IM et al. 2013. Mosaic copy  
619 number variation in human neurons. *Science* **342**: 632-637.
- 620 Navin N, Kendall J, Troge J, Andrews P, Rodgers L, McIndoo J, Cook K, Stepansky  
621 A, Levy D, Esposito D et al. 2011. Tumour evolution inferred by single-cell  
622 sequencing. *Nature* **472**: 90-94.
- 623 Nilsen G, Liestøl K, Van Loo P, Vollan HK, Eide MB, Rueda OM, Chin SF, Russell  
624 R, Baumbusch LO, Caldas C et al. 2012. Copynumber: Efficient algorithms for  
625 single-and multi-track copy number segmentation. *BMC genomics* **13**: 1-6.
- 626 Olshen AB, Venkatraman ES, Lucito R, Wigler M. 2004. Circular binary  
627 segmentation for the analysis of array-based DNA copy number data.  
628 *Biostatistics* **5**: 557-572.
- 629 Richardson SR, Morell S, Faulkner GJ. 2014. L1 retrotransposons and somatic  
630 mosaicism in the brain. *Annual review of genetics* **48**: 1-27.
- 631 Rohrback S, April C, Kaper F, Rivera RR, Liu CS, Siddoway B, Chun J. 2018.  
632 Submegabase copy number variations arise during cerebral cortical



- 633 neurogenesis as revealed by single-cell whole-genome sequencing. *Proceedings*  
634 *of the National Academy of Sciences* **115**: 10804-10809.
- 635 Sanchez-Luque FJ, Kempen MJ, Gerdes P, Vargas-Landin DB, Richardson SR,  
636 Troskie RL, Jesuadian JS, Cheetham SW, Carreira PE, Salvador-Palomeque C  
637 et al. 2019. LINE-1 evasion of epigenetic repression in humans. *Molecular cell*  
638 **75**: 590-604.
- 639 Sandovici I, Naumova AK, Leppert M, Linares Y, Sapienza C. 2004. A longitudinal  
640 study of X-inactivation ratio in human females. *Human genetics* **115**: 387-392.
- 641 Santaguida S, Amon A. 2015. Short-and long-term effects of chromosome mis-  
642 segregation and aneuploidy. *Nature reviews Molecular cell biology* **16**: 473-  
643 485.
- 644 Shah SP, Xuan X, DeLeeuw RJ, Khojasteh M, Lam WL, Ng R, Murphy KP. 2006.  
645 Integrating copy number polymorphisms into array CGH analysis using a robust  
646 HMM. *Bioinformatics* **22**: e431-e439.
- 647 Sharp A, Robinson D, Jacobs P. 2000. Age-and tissue-specific variation of X  
648 chromosome inactivation ratios in normal women. *Human genetics* **107**: 343-  
649 349.
- 650 Sudmant PH, Rausch T, Gardner EJ, Handsaker RE, Abyzov A, Huddleston J, Zhang  
651 Y, Ye K, Jun G, Fritz MH et al. 2015. An integrated map of structural variation  
652 in 2,504 human genomes. *Nature* **526**: 75-81.
- 653 The Wellcome Trust Case Control Consortium. 2010. Genome-wide association study  
654 of CNVs in 16,000 cases of eight common diseases and 3,000 shared controls.  
655 *Nature* **464**: 713–720.
- 656 van den Bos H, Spierings DC, Taudt A, Bakker B, Porubský D, Falconer E, Novoa C,  
657 Halsema N, Kazemier HG, Hoekstra-Wakker K et al. 2016. Single-cell whole  
658 genome sequencing reveals no evidence for common aneuploidy in normal and  
659 Alzheimer’s disease neurons. *Genome biology* **17**: 1-9.

- 660 Vattathil S, Scheet P. 2016. Extensive hidden genomic mosaicism revealed in normal  
661 tissue. *The American Journal of Human Genetics* **98**: 571-578.
- 662 Vitak SA, Torkenczy KA, Rosenkrantz JL, Fields AJ, Christiansen L, Wong MH,  
663 Carbone L, Steemers FJ, Adey A. 2017. Sequencing thousands of single-cell  
664 genomes with combinatorial indexing. *Nature methods* **14**: 302-308.
- 665 Waddell N, Pajic M, Patch AM, Chang DK, Kassahn KS, Bailey P, Johns AL, Miller  
666 D, Nones K, Quek K et al. 2015. Whole genomes redefine the mutational  
667 landscape of pancreatic cancer. *Nature* **518**: 495-501.
- 668 Yurov YB, Iourov IY, Vorsanova SG, Liehr T, Kolotii AD, Kutsev SI, Pellestor F,  
669 Beresheva AK, Demidova IA, Kravets VS et al. 2007. Aneuploidy and confined  
670 chromosomal mosaicism in the developing human brain. *PloS one* **2**: e558.
- 671 Zahn H, Steif A, Laks E, Eirew P, VanInsberghe M, Shah SP, Aparicio S, Hansen CL.  
672 2017. Scalable whole-genome single-cell library preparation without  
673 preamplification. *Nature methods* **14**: 167-173.
- 674 Zarrei M, MacDonald JR, Merico D, Scherer SW. 2015. A copy number variation  
675 map of the human genome. *Nature reviews genetics* **16**: 172-183.
- 676 Zhang CZ, Adalsteinsson VA, Francis J, Cornils H, Jung J, Maire C, Ligon KL,  
677 Meyerson M, Love JC. 2015. Calibrating genomic and allelic coverage bias in  
678 single-cell sequencing. *Nature communications* **6**: 1-10.
- 679 Zhang F, Gu W, Hurles ME, Lupski JR. 2009. Copy number variation in human  
680 health, disease, and evolution. *Annual review of genomics and human genetics*  
681 **10**: 451-481.
- 682 Zito A, Davies MN, Tsai PC, Roberts S, Andres-Ejarque R, Nardone S, Bell JT,  
683 Wong CC, Small KS. 2019. Heritability of skewed X-inactivation in female  
684 twins is tissue-specific and associated with age. *Nature communications* **10(1)**:  
685 1-11.  
686

687 **Figures**

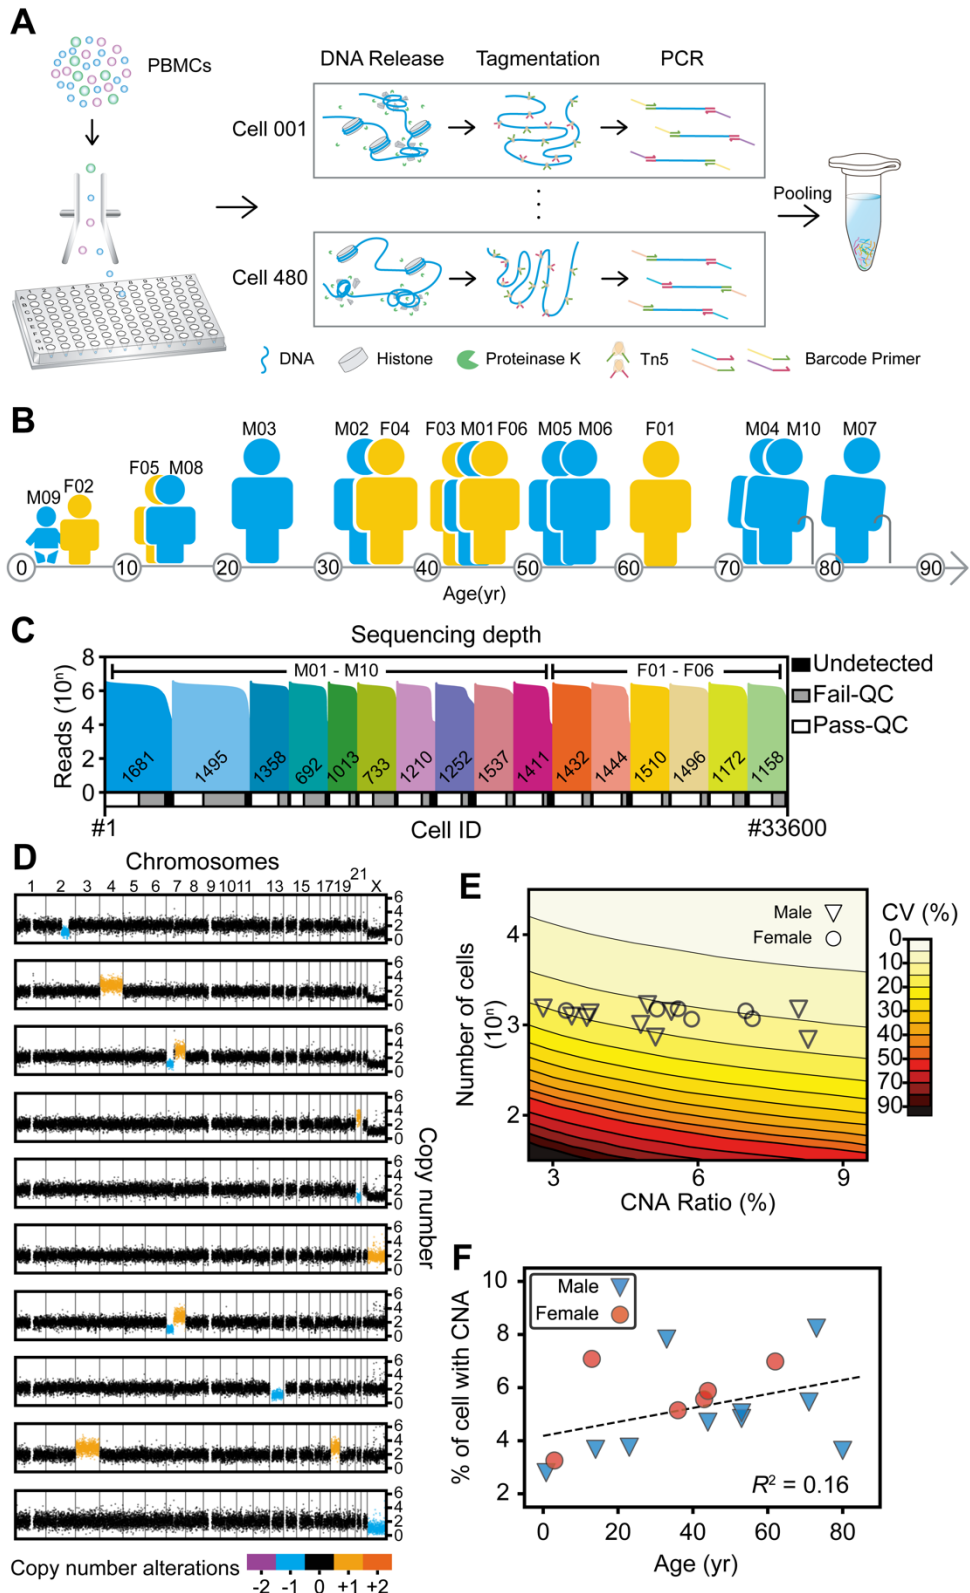

688

689

**Fig. 1. Overview of the study design. (A)** Experimental flow used in this study.

690

Lymphocytes were sorted to 96-well plates using fluorescence-activated cell sorting

691

to obtain 1 cell per well. Thousands of those single-cells were lysed, tagmented,

692

barcoded, and amplified in their wells and then pooled for second-generation

693 sequencing. PBMC, peripheral blood mononuclear cells. **(B)** Cartoon showing the  
694 blood donors' ages, sex, and ID numbers: 6 females (F) and 10 males (M) between 9  
695 months and 80 years of age. **(C)** Sequencing depths and cell numbers for all samples  
696 in this study. The top histogram shows the reads counts distribution and the diagram  
697 underneath represents the relative proportions of cells after filtering. Undetected, low  
698 read counts; Fail-QC, failed quality filtering; Pass-QC, passed quality filtering. **(D)**  
699 Copy number profiles of representative cells with copy number alterations (CNAs) in  
700 colors. **(E)** Coefficients of variation (CV) of CNA ratio estimations. The contour plot  
701 shows both the theoretical CVs of CNA ratios (calculated by simulation) and the  
702 sample sizes (number of cells). The symbols show the real CNA ratios and sample  
703 sizes for each sample in this study. The large sample size in our study ensured that the  
704 CV was in a relatively small interval, thus providing acceptably accurate estimations.  
705 **(F)** Ages and autosomal CNA percentages of each sample. The dashed line indicates a  
706 weak linear relationship between age and CNA ratios.  
707

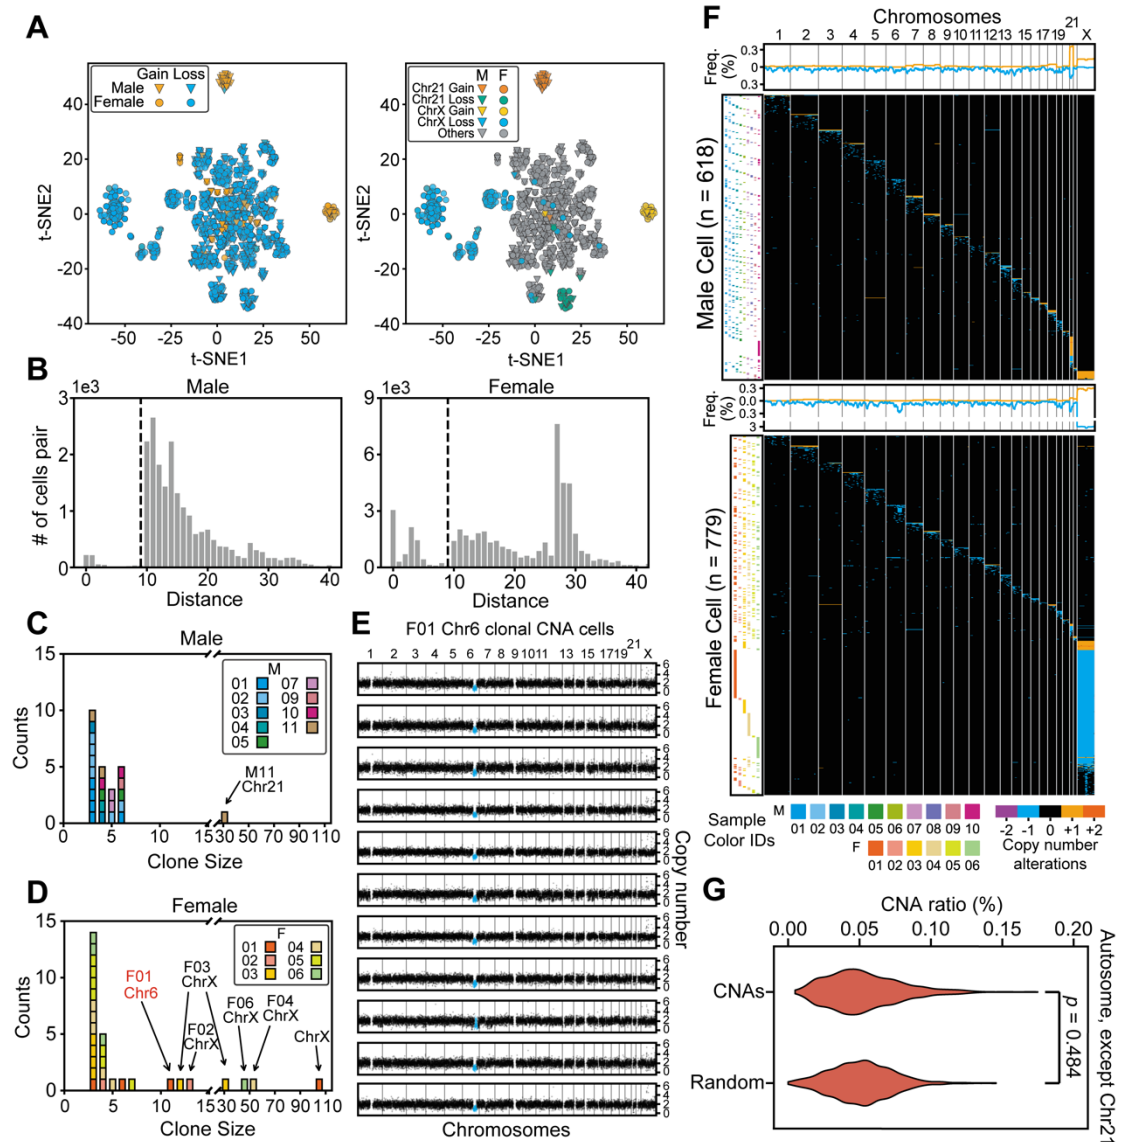

708

709 **Fig. 2. The landscape of cells with copy number alterations (CNAs).** (A) Low-  
 710 dimensional representations produced through multidimensional scaling of the copy  
 711 number profiles for cells with >10-Mb CNAs. Colors label different types and  
 712 locations of CNAs. t-SNE, *t*-distributed stochastic neighbor embedding. (B) The  
 713 distributions of Euclidean distances between cell pairs. Two clusters were clearly  
 714 separated by distance ( $d$ ) < 10 (indicated by dashed lines) in both male and female  
 715 samples. (C, D) The sizes (number of cells in a clone) and counts of clonal CNAs.  
 716 Each block in the bar plot represents a clone. Most clonal CNAs with bigger clone  
 717 sizes were on chr 21 and chr X, although there are some small clones with cell  
 718 numbers of about 3–5. (E) Copy number profiles of each clonal CNA on chr 6 in 11  
 719 cells from F01. Each graph represents 1 cell and the blue dots represent the regions  
 720 with copy number alterations. (F) Overview showing every cell with >10-Mb CNAs  
 721 each. The heatmap (in black) demonstrates the genome patterns for cells with CNAs,  
 722 which are labeled by different colors for gain and loss. Cells were sorted according to  
 723 the chromosome fraction carrying CNAs. Each row represents one cell. The scatter

724 plot (left) shows the cells' sample IDs. The density curve along the top of each  
725 heatmap shows the aggregate frequency, at 200-kb bins, among all samples for each  
726 genomic locus. **(G)** CNA frequency distribution for each genomic locus in all  
727 autosomes except for Chr 21. The distributions of this study's CNAs and of randomly  
728 generated CNAs were not significantly different (Mann–Whitney  $U$  test), thus  
729 indicating a random generation mechanism.  
730

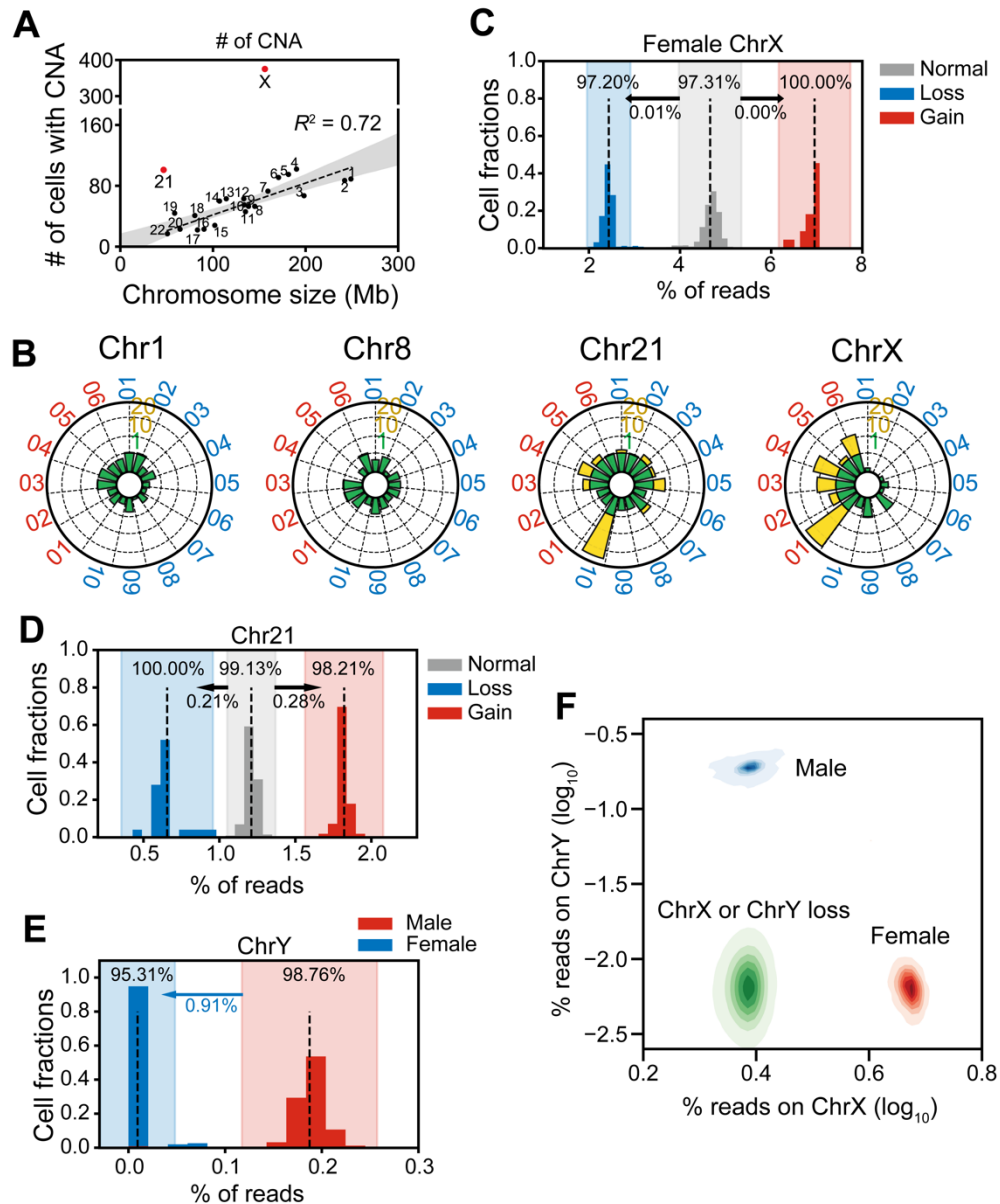

731

732

**Fig. 3. Clonal analysis of cells with CNAs.** (A) Numbers of cells with CNAs for each chromosome. The dashed line indicates a significant correlation between chromosome size and numbers of CNAs. Chromosomes 21 and X (red) had markedly higher numbers of CNAs than the rest of the chromosomes had. (B) Radar plots show normalized CNA counts in 4 chromosomes from every individual labeled around each plot (blue, male; red, female). Internal colors denote a graded scale of CNA counts (green, 0–1; yellow, 1–20). (C–E) Reads counts distributions on Chromosomes X (C), 21 (D), and Y (E). Each histogram shows the normalized reads distributions for each type of cells (gain, loss, and normal). Dashed lines indicate the means of each type of cell. The color shade indicates the confidence interval within 3 standard deviations. The percentage in each shaded bar indicates the fraction of cells identified as normal/loss/gain using reads counts. The percentages under the arrows shows the fractions of normal cells found, using reads counts, in the loss/gain confidence intervals. For Chromosome Y, those male cells that fell into the female confidence

745

746 interval were identified as Chromosome Y losses. **(F)** Reads densities of Chr X and  
747 Chr Y of normal male cells (blue), normal female cells (red), and abnormal male and  
748 female cells with Chr Y or Chr X loss, respectively (both green).  
749



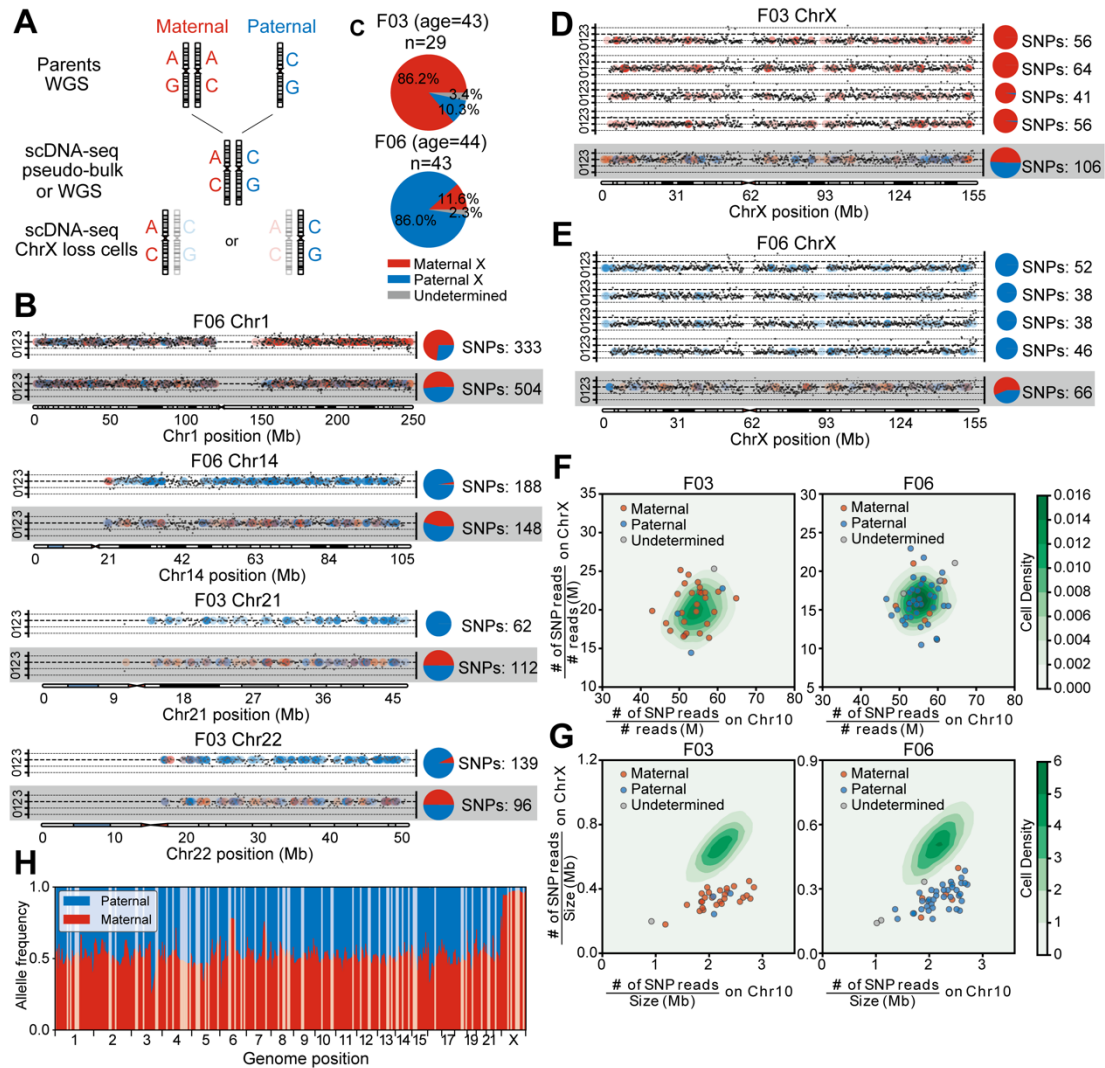

750  
 751 **Fig. 4. Single-cell (female) haplotype analysis.** (A) Haplotype identification pipeline  
 752 of representative chromosome loss cells. For each candidate, two parental genomes  
 753 were sequenced by whole genome sequencing (WGS). Then, using WGS data or  
 754 merged single-cell data (pseudo-bulk), we identified each candidate's heterogeneous  
 755 sites. Combined with parental data, the heterogeneous sites were labeled paternal or  
 756 maternal. Finally, we analyzed each candidate's single cells that had chromosome loss  
 757 and extracted heterogeneous sites covered by reads, identifying each as paternal or  
 758 maternal. (B) Copy number profiles and haplotype identifications of cells with lost  
 759 heterozygosity. Black dots show the copy number for each genome locus and dashed  
 760 lines indicate the integer copy number (0,1,2,3). Colored dots represent the sources of  
 761 a heterozygous site (red, maternal; blue, paternal) and the pie charts demonstrate the  
 762 paternal/maternal compositions (numbers of single-nucleotide polymorphisms  
 763 [SNPs]) of heterozygous sites on each chromosome. Results from normal cells are  
 764 shown on the bottom for comparison. (C) Paternal and maternal allele composition of  
 765 two individuals' cells with lost X Chromosomes. Most of the X-loss cells were of the  
 766 same parental allele. (D, E) Copy number profiles and haplotype identifications of  
 767 cells with lost X Chromosomes and of normal cells, as controls (bottom lines). (F)

768 SNP densities and **(G)** reads densities on chromosomes of normal and ChrX-loss  
769 cells. The contour plots show the normal cells' distributions and the scatter plots show  
770 the ChrX-loss cells. Cells with lost X Chromosomes that have lower reads density on  
771 ChrX, but comparable SNPs density, were not contaminated by male or parental cells.  
772 **(H)** Allele compositions of heterogeneous sites in bulk RNA-seq reads of F03 cells.  
773 Most of the genomic region displays bi-allelic expression (allele composition ~50%),  
774 but Chr X clearly shows a maternal bias, which is corrected when most Chr X-loss  
775 cells are paternal.  
776
